# Supplementary material for: Mid-Embryo Patterning and Precision in Drosophila Segmentation: Krüppel Dual Regulation of hunchback
Source: PubMed Central journal article supplement (PMC4368514; doi:10.1371/journal.pone.0118450), 2015-03-20
Supplement: pone.0118450.s001.pdf [file pone.0118450.s001.pdf]

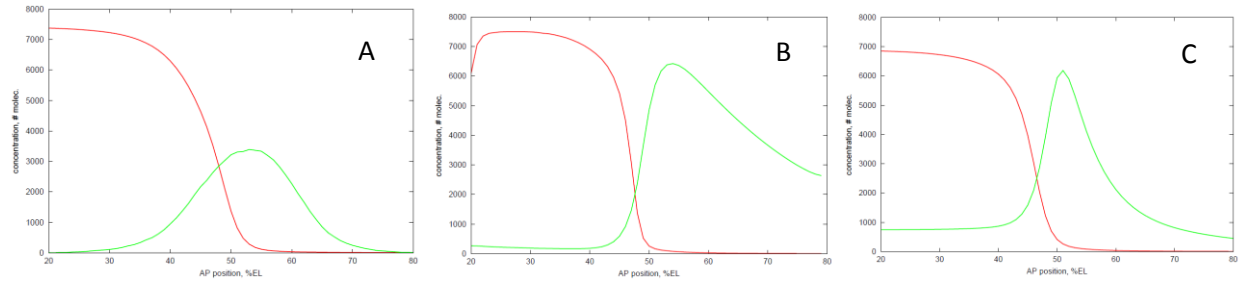

**S1 Figure. Simple Kr inhibition of *hb* produces unrefined anterior ‘step’ pattern.** (Kr only inhibits *hb*, it provides no activation.) Deterministic solutions of mechanisms: **(A)** static Kr; **(B)** Hb-Kr mutual inhibition (**mut inh**); and **(C)** **Hb dual**. Red – Hb protein; Green – Kr protein. Shown at  $t=30$  minutes. Vertical, number of protein molecules per nucleus + surrounding cytoplasm; horizontal, AP position in %EL. **(A)** static Kr model: *hb* is activated by Bcd and Hb (as in [37]), Kr is a fixed, unchanging concentration gradient which inhibits *hb*. **(B)** mutual inhibition (**mut inh**): Kr is now dynamic – activated by Bcd and inhibited Hb; *hb* is activated by Bcd and Hb, and inhibited by Kr. **(C)** **Hb dual** model: Kr is dual regulated by Hb – activated at low [Hb] and inhibited at high [Hb] (Bcd activation of *Kr* is not modelled); Hb is as in **(A)**, **(B)**. In all cases, *hb* activation by Bcd and Hb and inhibition by Kr produces an unrefined anterior Hb step pattern.
