# Supplementary material for: Mid-Embryo Patterning and Precision in Drosophila Segmentation: Krüppel Dual Regulation of hunchback
Source: PubMed Central journal article supplement (PMC4368514; doi:10.1371/journal.pone.0118450), 2015-03-20
Supplement: pone.0118450.s003.pdf [file pone.0118450.s003.pdf]

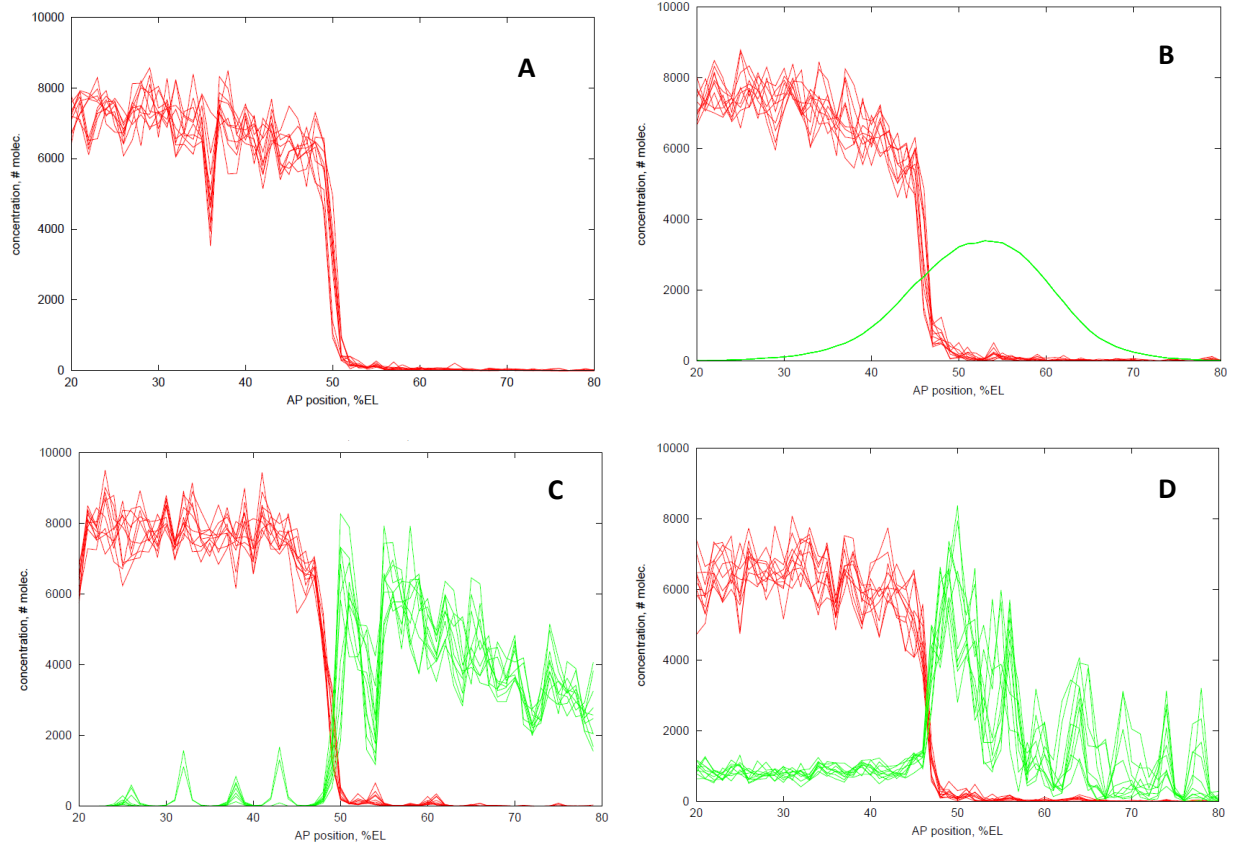

**E**

| Hb range at half height | no Kr (A) | static Kr (B) | mutual inhibition (C) | Hb dual (D) |
|-------------------------|-----------|---------------|-----------------------|-------------|
| mean                    | 1.10      | 1.05          | 0.55                  | 0.50        |
| std. dev.               | 0.37      | 0.63          | 0.25                  | 0.24        |
| <i>n</i>                | 11        | 8             | 10                    | 10          |

**S3 Figure. Interface noise reduction with mutual Hb-Kr interaction.** Hb – red, Kr – green. All simulation results shown as overlays at 1 minute intervals,  $t=20-29$ . (A) no Kr, Hb expression depends on Bcd and Hb; (B) static Kr (Kr is not dynamically maintained, it is a fixed inhibition gradient for *hb*); (C) Hb-Kr mutual inhibition (**mut inh**, both are activated by Bcd and inhibit each other); (D) **Hb dual** mechanism (Hb activates and inhibits *Kr*, *Kr* simply inhibits *hb*). (E) Statistics for multiple simulations with each mechanism. Over  $t=20-29$ , the **mut inh** and **Hb dual** mechanisms have lower ranges in the position at which Hb crosses half-height than with no Kr or with static Kr ( $t$ -test of mean differences,  $p<0.05$ ). (A), (B), (C), (D) show simulations with average range of position for each mechanism. This indicates that not only simple Kr inhibition of *hb* (B), but their mutual interaction, plays a role in making their interface more determinate.
